# Supplementary material for: Anticancer drug encapsulated in inorganic lattice can overcome drug resistance
Source: Royal Society of Chemistry journal article supplement (doi:10.1039/b925831k), 2010-01-01
Supplement: b925831k.pdf [file b925831k.pdf]

## Anticancer drug encapsulated in inorganic lattice can overcome drug resistance

Soo-Jin Choi<sup>a</sup>, Go Eun Choi<sup>b</sup>, Jae-Min Oh<sup>c</sup>, Yeon-Ji Oh<sup>b</sup>, Myung-Chul Park<sup>b</sup> and Jin-Ho Choy<sup>\*b</sup>

### Supporting information

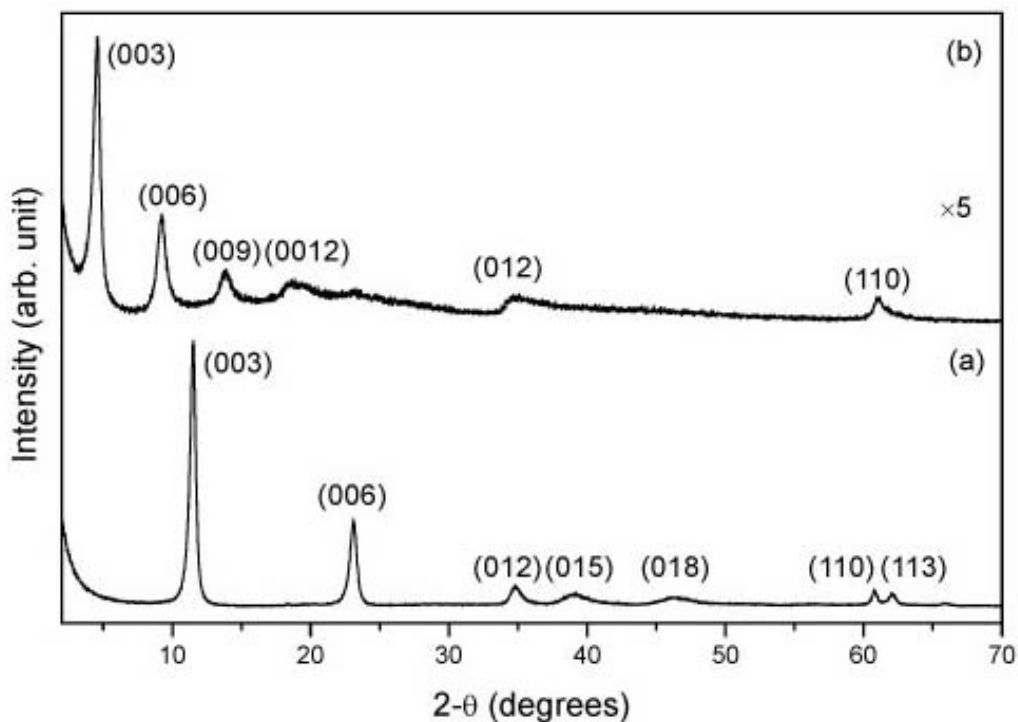

Supporting Figure 1. X-ray diffraction pattern of (a) pristine LDH and (b) MTX-LDH. The intensity of pattern (b) was multiplied by  $\times 5$  for the comparison with (a)

As shown in the powder X-ray diffraction pattern in supporting fig. 1, both pristine LDH having  $\text{Cl}^-$  ions and MTX-LDH represent well-developed  $(00l)$  peaks, revealing the 2-dimensional structure. The  $(003)$  peak appeared at  $2\theta \sim 11.35^\circ$  and  $4.45^\circ$  for MTX-LDH and pristine LDH, respectively, and the values correspond to the d-spacing of 0.78 and 1.99 nm.
